# Supplementary material for: The role of aristolochene synthase in diphosphate activation
Source: Royal Society of Chemistry journal article supplement (doi:10.1039/c2cc17588f), 2012-01-01
Supplement: c2cc17588f.pdf [file c2cc17588f.pdf]

Supporting information for

## **The role of aristolochene synthase in diphosphate activation**

Juan A. Faraldos, Verónica González and Rudolf K. Allemann\*

*School of Chemistry, Cardiff University, Main Building, Park Place, Cardiff, CF10 3AT, United Kingdom. Fax: 44 29 2087 4030; E-mail: [allemannrk@cf.ac.uk](mailto:allemannrk@cf.ac.uk).*

### **Table of contents**

|                                                                                    |         |
|------------------------------------------------------------------------------------|---------|
| Site directed mutagenesis of recombinant PR-AS cDNA.....                           | S2      |
| Expression of wild type PR-AS and mutants.....                                     | S3      |
| GC/MS analysis.....                                                                | S3      |
| Steady-state kinetic assays.....                                                   | S3      |
| Kinetic parameters and product distributions for PR-AS and mutants.....            | S4      |
| Amino acid sequence alignment of fungal and bacterial sesquiterpene synthases..... | S5      |
| Representative GC/MS spectra.....                                                  | S6-S9   |
| Representative Lineweaver-Burk plots.....                                          | S9-S10  |
| Representative Michaelis-Menten plots.....                                         | S11-S12 |
| References.....                                                                    | S12     |

### Site directed mutagenesis of recombinant PR-AS cDNA

The Quickchange site-directed mutagenesis kit (Stratagene) was used to introduce the desired mutations according to the manufacturer's instructions. The primers used for mutagenesis were as follows:

5'-GGGCATTATCTCGAGTACAAAGAGAAGGATGTAGGCAAG-3' and  
5'-CTTGCCTACATCCTTCTCTTTGTACTCGAGATAATGCCC-3' for R200K;  
5'-GGCATTATCTCGAGTACGAAGAGAAGGATGTAGGCAAG-3' and  
5'-CTTGCCTACATCCTTCTCTTCGTA ACTCGAGATAATGCC-3' for R200E;  
5'-GCATTATCTCGAGTACCAGGAGAAGGATGTAGGCAAG-3' and  
5'-CTTGCCTACATCCTTCTCCTGGTACTCGAGATAATGC-3' for R200Q;  
5'-TCGAGTACCGTGAGAAGCTGGTAGGCAAGGCGTTGC-3' and  
5'-GCAACGCCTTGCCTACCAGCTTCTCACGGTACTCGA-3' for D203L;  
5'-CATATACAGTTATGACCAGGAAGAGGAAGCGTC-3' and  
5'-GACGCTTCCTCTTCCTGGTCATAACTGTATATG-3' for K251Q;  
5'-GACATATACAGTTATGACCGTGAAGAGGAAGCGTCTCG-3' and  
5'-CGAGACGCTTCCTCTTCACGGTCATAACTGTATATGTC-3' for K251R  
5'-GGAGCAAGACCACGCGTAAATACA ACTAAGGATCCTC-3' and  
5'-GAGGATCCTTAGTTGTATTTACGCGTGGTCTTGCTCC-3' for R340K;  
5'-GAGCAAGACCACGCGTATGTACA ACTAAGGATCCTC-3' and  
5'-GAGGATCCTTAGTTGTACATACGCGTGGTCTTGCTC-3' for R340M;  
5'-CAAGACCACGCGTCGCTTTA ACTAAGGATCCTCTAG-3' and  
5'-CTAGAGGATCCTTAGTTAAAGCGACGCGTGGTCTTG-3' for Y341F;

Plasmids were purified from overnight cultures (10 mL LB medium containing ampicillin 50 µM/mL) using the QIAGEN miniprep kit as described by the manufacturer. Mutations were confirmed by DNA sequence analysis using Eurofins MWG.

### **Expression of wild type PR-AS and mutants**

PR-AS and mutants were overproduced in *E. coli* BL21(DE3) cells and purified as previously described.<sup>1</sup>

### **GC/MS analysis**

Proteins (50  $\mu$ M) were incubated with FPP (1 mM) in incubation buffer (25 mM Tris, pH 7.5, 5 mM beta-mercaptoethanol, 15% glycerol and 5 mM MgCl<sub>2</sub>) in a total volume of 250  $\mu$ L. The reaction was overlaid with pentane and left overnight. Products were extracted with 2 portions of 500  $\mu$ L pentane and the combined organic layers passed through a short column of aluminium oxide. GC-MS analysis of incubation products was performed using a HP 6890 GC-MS system fitted with J & W Scientific HP-5MS column (30 m length and internal diameter of 0.25 mm) and a Micromass GCT Premiere mass spectrometer for detection. The program uses an initial oven temperature of 50 °C with a gradient of 4 °C min<sup>-1</sup> over 25 min followed by a gradient of 20 °C min<sup>-1</sup> over 5 min to a final temperature of 250 °C.

### **Steady-state kinetic assays**

Kinetic assays were carried out as previously described.<sup>2-4</sup> Steady-state parameters were obtained by direct fitting of the data to the Michaelis-Menten equation by nonlinear least squares regression using the graphical procedures developed by Lineweaver-Burk<sup>5</sup> within the SigmaPlot package (Systat Software).

**Table 1: Kinetic parameters and product distributions for PR-AS and mutants<sup>a</sup>**

|       | <b>4</b> | <b>2</b> | <b>5</b> | <b>K<sub>M</sub></b> | <b>k<sub>cat</sub> x10<sup>-3</sup></b> | <b>k<sub>cat</sub>/K<sub>M</sub></b> |
|-------|----------|----------|----------|----------------------|-----------------------------------------|--------------------------------------|
|       | (%)      | (%)      | (%)      | (μM)                 | (s <sup>-1</sup> )                      | (M <sup>-1</sup> s <sup>-1</sup> )   |
| WT    | 91.5     | 7.5      | 1        | 0.53                 | 84                                      | 158490                               |
| R200K | 19.2     | 78.9     | 1.8      | 1.04                 | 0.6                                     | 620                                  |
| R200Q |          |          |          | Inactive             |                                         |                                      |
| R200E |          |          |          | Inactive             |                                         |                                      |
| D203L | 17.3     | 79.7     | 3        | 0.74                 | 0.75                                    | 1013                                 |
| K251R | 90.2     | 6        | 3.8      | 0.14                 | 3.7                                     | 26428                                |
| K251Q | 84.6     | 9.8      | 5.6      | 0.24                 | 2                                       | 8500                                 |
| R340K | 54.4     | 42.8     | 2.8      | 1.59                 | 0.8                                     | 510                                  |
| R340M |          |          |          | Inactive             |                                         |                                      |
| Y341F | 93.3     | 3.8      | 2.9      | 0.18                 | 2.5                                     | 14000                                |

<sup>a</sup>Reported values are the average of 3 measurements; all values were within 5% of the average.



### GC/MS Spectra

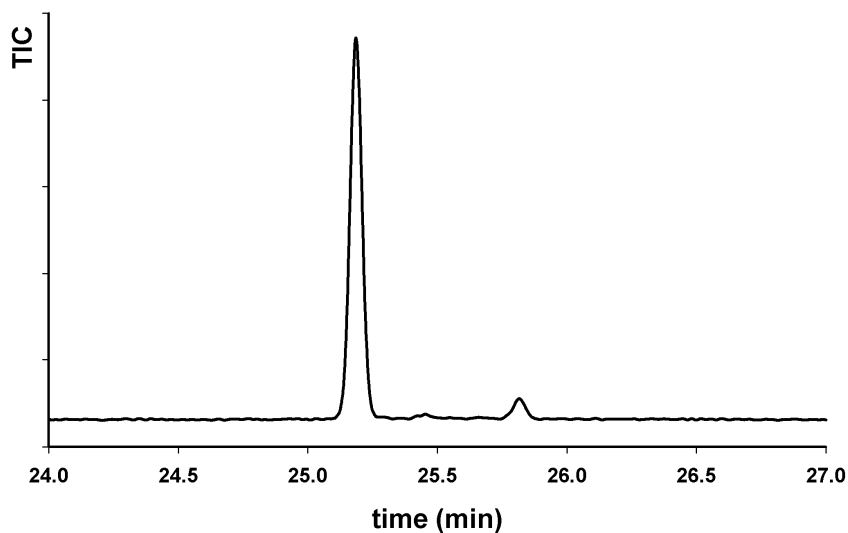

**Figure S2.** Representative total ion chromatogram of the pentane extractable products formed from incubation of FDP and PR-AS: aristolochene (retention time, 24.60 min), valencene (24.93 min) and germacrene A (25.22 min).

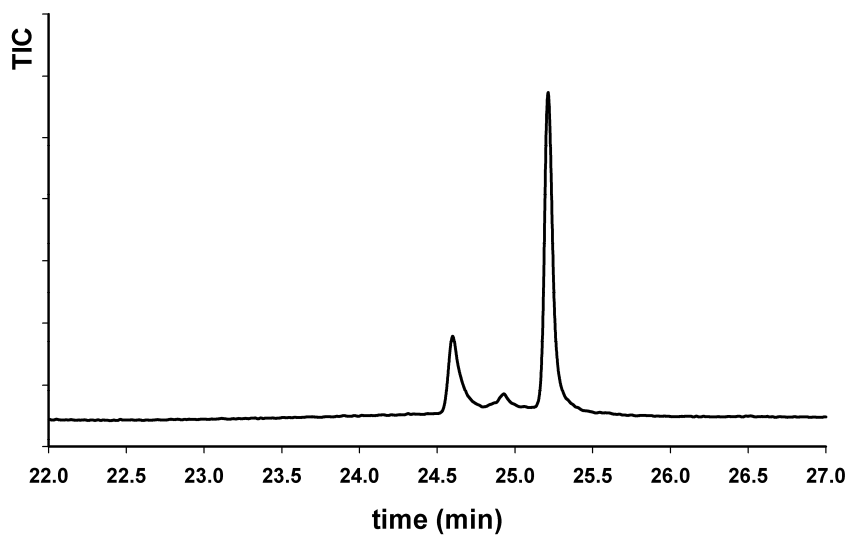

**Figure S3.** Representative total ion chromatogram of the pentane extractable products formed from incubation of FDP and PR-AS-R200K: aristolochene (retention time, 24.60 min), valencene (24.93 min) and germacrene A (25.22 min).

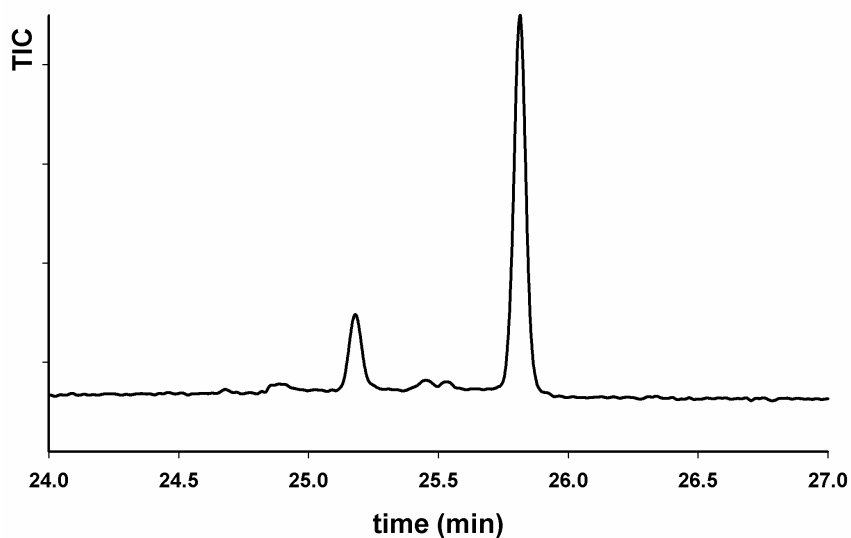

**Figure S4.** Representative total ion chromatogram of the pentane extractable products formed from incubation of FDP and PR-AS-D203L: aristolochene (retention time, 25.18 min), valencene (25.48 min) and germacrene A (25.82 min).

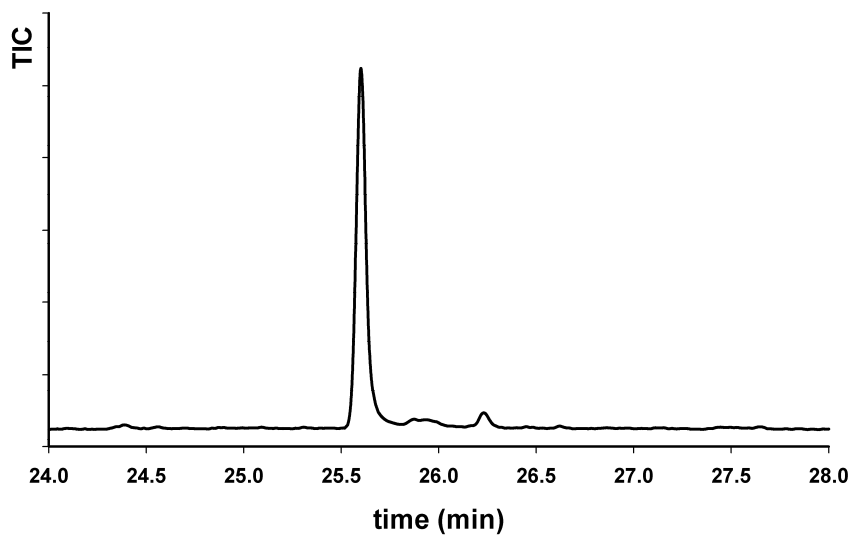

**Figure S5.** Representative total ion chromatogram of the pentane extractable products formed from incubation of FDP and PR-AS-K251Q: aristolochene (retention time, 25.60 min), valencene (25.88 min) and germacrene A (26.23 min).

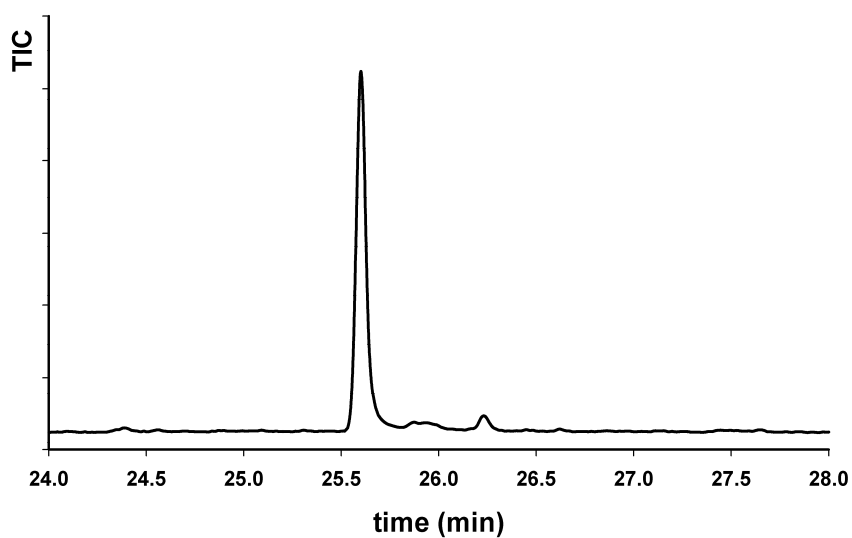

**Figure S6.** Representative total ion chromatogram of the pentane extractable products formed from incubation of FDP and PR-AS-K251R: aristolochene (retention time, 25.60 min), valencene (25.88 min) and germacrene A (26.23 min).

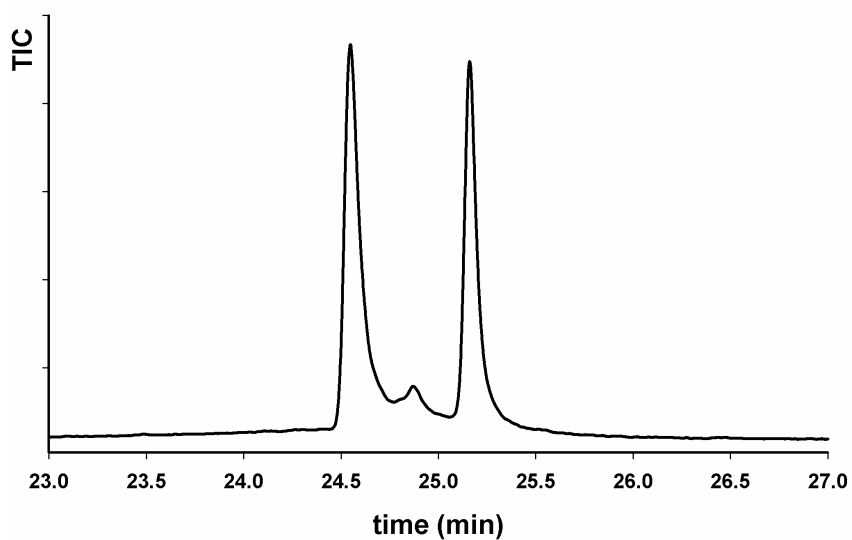

**Figure S7.** Representative total ion chromatogram of the pentane extractable products formed from incubation of FDP and PR-AS-R340K: aristolochene (retention time, 24.55 min), valencene (24.93 min) and germacrene A (25.22 min).



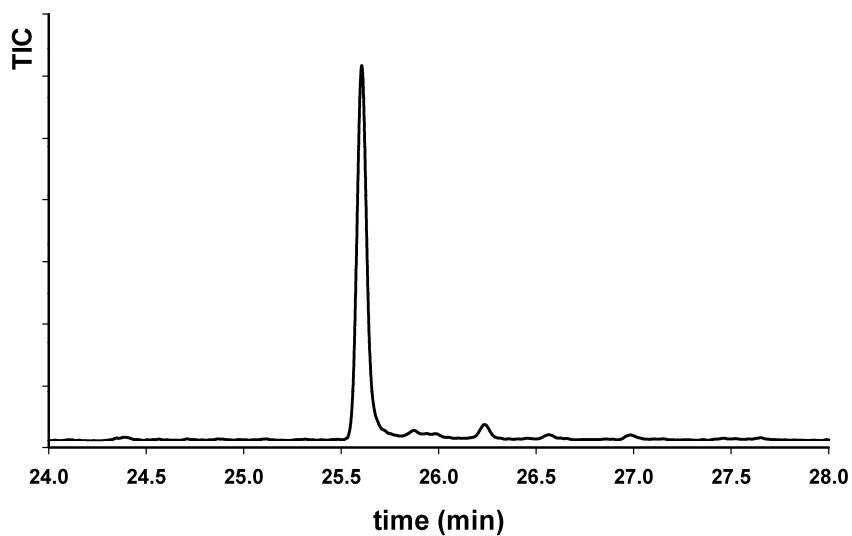

**Figure S8.** Representative total ion chromatogram of the pentane extractable products formed from incubation of FDP and PR-AS-Y341F: aristolochene (retention time, 25.60 min), valencene (25.88 min) and germacrene A (26.23 min).

### Lineweaver-Burk plots

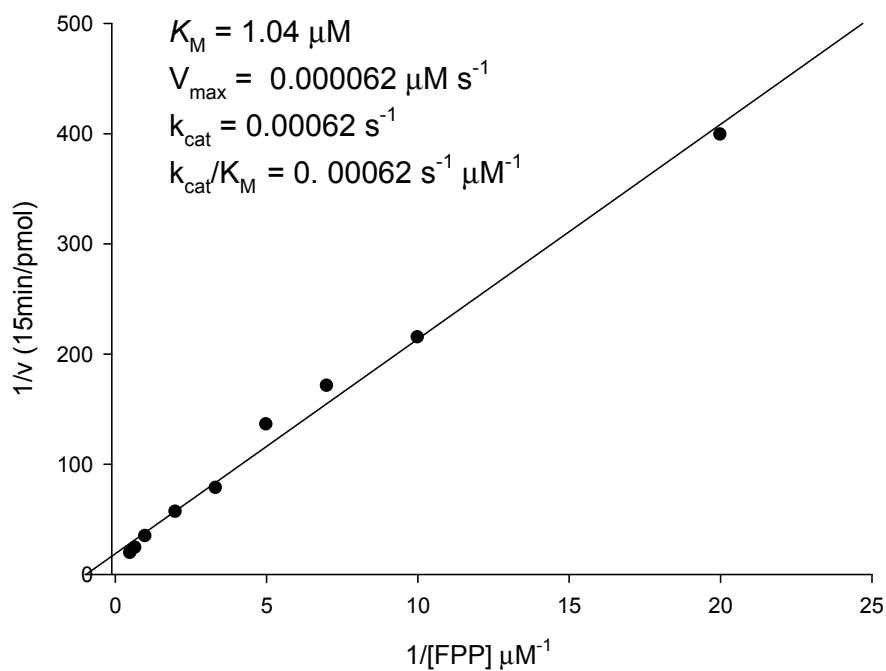

**Figure S9.** Representative Lineweaver-Burk plot for PR-AS-R200K.

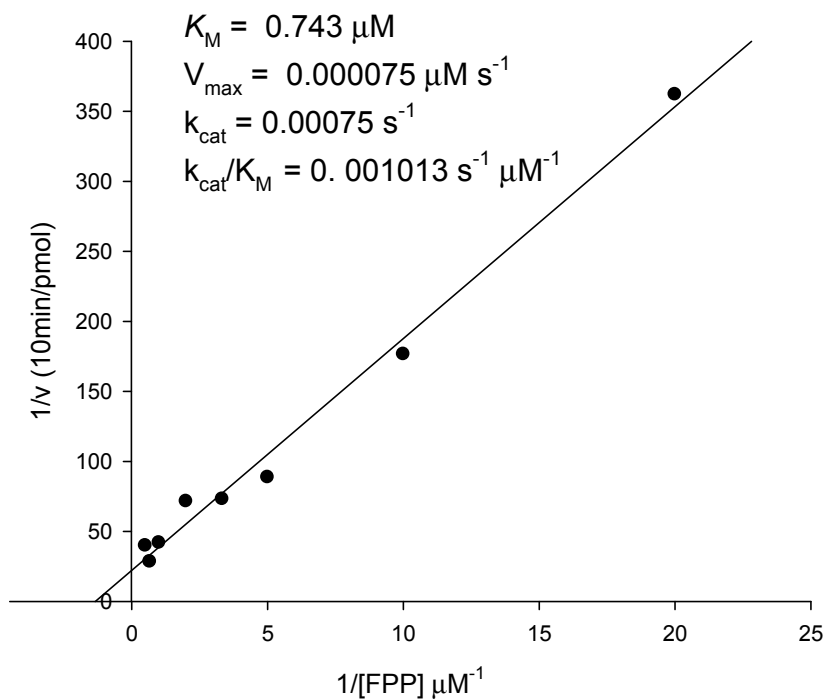

**Figure S10.** Representative Lineweaver-Burk plot for PR-AS-D203L.

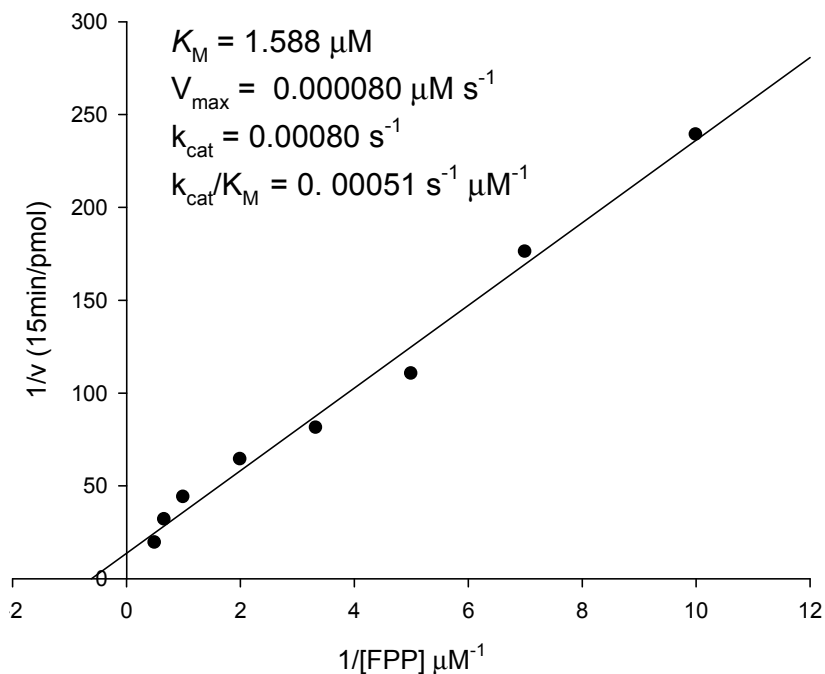

**Figure S11.** Representative Lineweaver-Burk plot for PR-AS-R340K.

### Michaelis-Menten plots

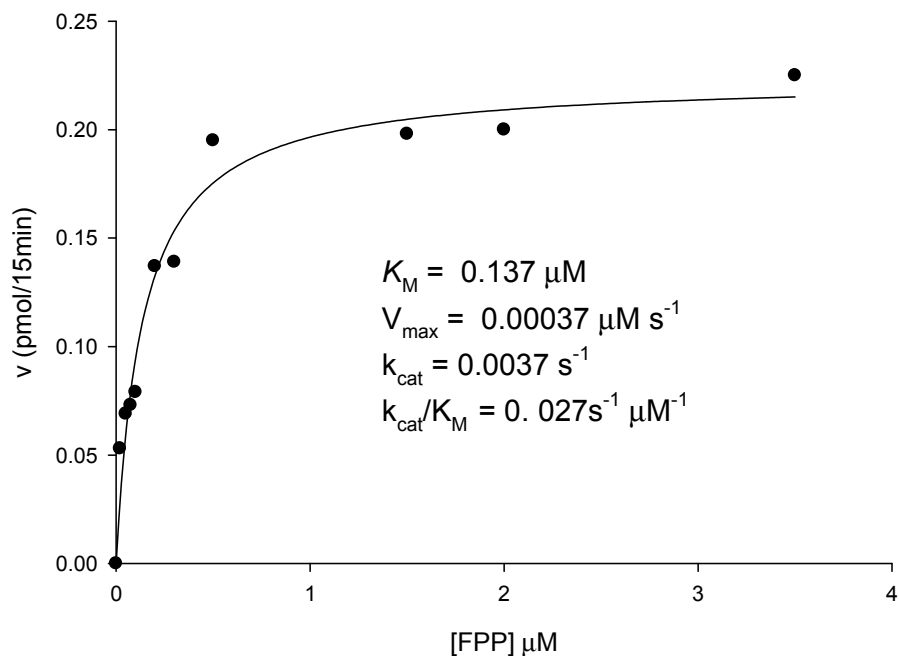

**Figure S12.** Representative Michaelis-Menten plot for PR-AS-K251R.

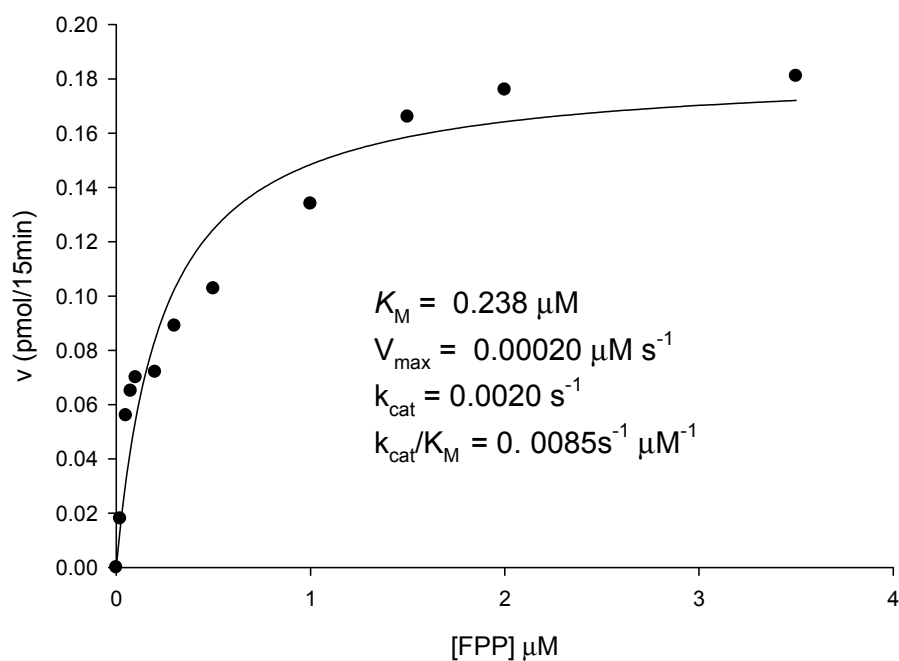

**Figure S13.** Representative Michaelis-Menten plot for PR-AS-K251Q.

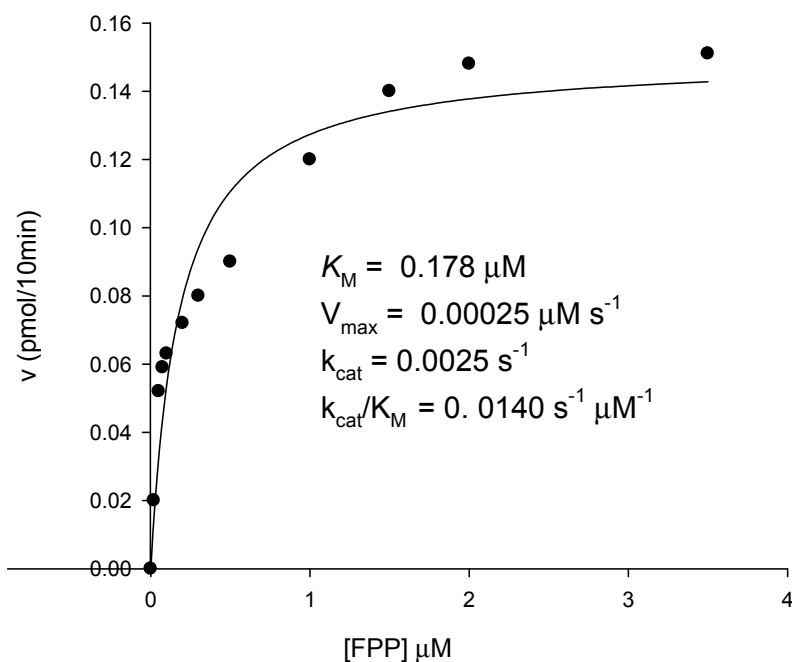

**Figure S14.** Representative Michaelis-Menten plot for PR-AS-Y341F.

## References

1. (a) J. M. Caruthers, I. Kang, M. J. Rynkiewicz, D. E. Cane and D. W. Christianson, *J. Biol. Chem.*, 2000, **275**, 25533-25539. (b) M. J. Calvert, P. R. Ashton and R. K. Allemann, *J. Am. Chem. Soc.* 2002, **124**, 11636.
2. F. Karp, Z. Yuxin, B. Santhamma, B. Assink, R. M. Coates, R. B. Croteau, *Arch. Biochem. Biophys.* 2007, **468**, 140-146.
3. J. A. Faraldos, B. Kariuki and R. K. Allemann, *J. Org. Chem.*, 2010, **75**, 1119-1125.
4. J. A. Faraldos, A. K. Antonczak, V. Gonzalez, R. Fullerton, E. M. Tippmann and R. K. Allemann, *J. Am. Chem. Soc.*, 2011, **133**, 13906-13909.
5. H. Lineweaver, D. Burk, *J. Am. Chem. Soc.* 1934, **56**, 658-666.
6. Z. Zhang, L. Wagner and W. Miller, *J. Comput. Biol.*, 2000, **7**, 203-214.
